# Supplementary material for: Effectiveness and Costs of Molecular Screening and Treatment for Bacterial Vaginosis to Prevent Preterm Birth: The AuTop Randomized Clinical Trial
Source: PubMed Central journal article supplement (PMC10352927; doi:10.1001/jamapediatrics.2023.2250), 2023-07-17
Supplement: jamapediatr-e232250-s003.pdf [file jamapediatr-e232250-s003.pdf]

## Supplemental Online Content

Bretelle F, Loubière S, Desbriere R, et al; the Groupe de Recherche en Obstetrique et Gynécologie (GROG) Investigators. Effectiveness and costs of molecular screening and treatment for bacterial vaginosis to prevent preterm birth: the AuTop randomized clinical trial. *JAMA Pediatr*. Published online July 17, 2023. doi:10.1001/jamapediatrics.2023.2250

**eFigure.** Schema of Treatment Algorithm

**eTable 1.** Table of Primers and Probes Used in the Study

**eMethods 1.** Molecular Analysis Procedure

**eMethods 2.** European Patent

**eTable 2.** Details of Cost Outcomes According to Randomly Assigned Groups in the AuTop Study

**eTable 3.** Sensitivity Analyses With Complete Cases and With Missing Values Imputed Using the Worst-Case Scenario

**eTable 4.** Characteristics of the Patients in the Subgroup of Nulliparous and Multiparous Women According to Randomly Assigned Group

This supplementary material has been provided by the authors to give readers additional information about their work.

eFigure. Schema of Treatment Algorithm

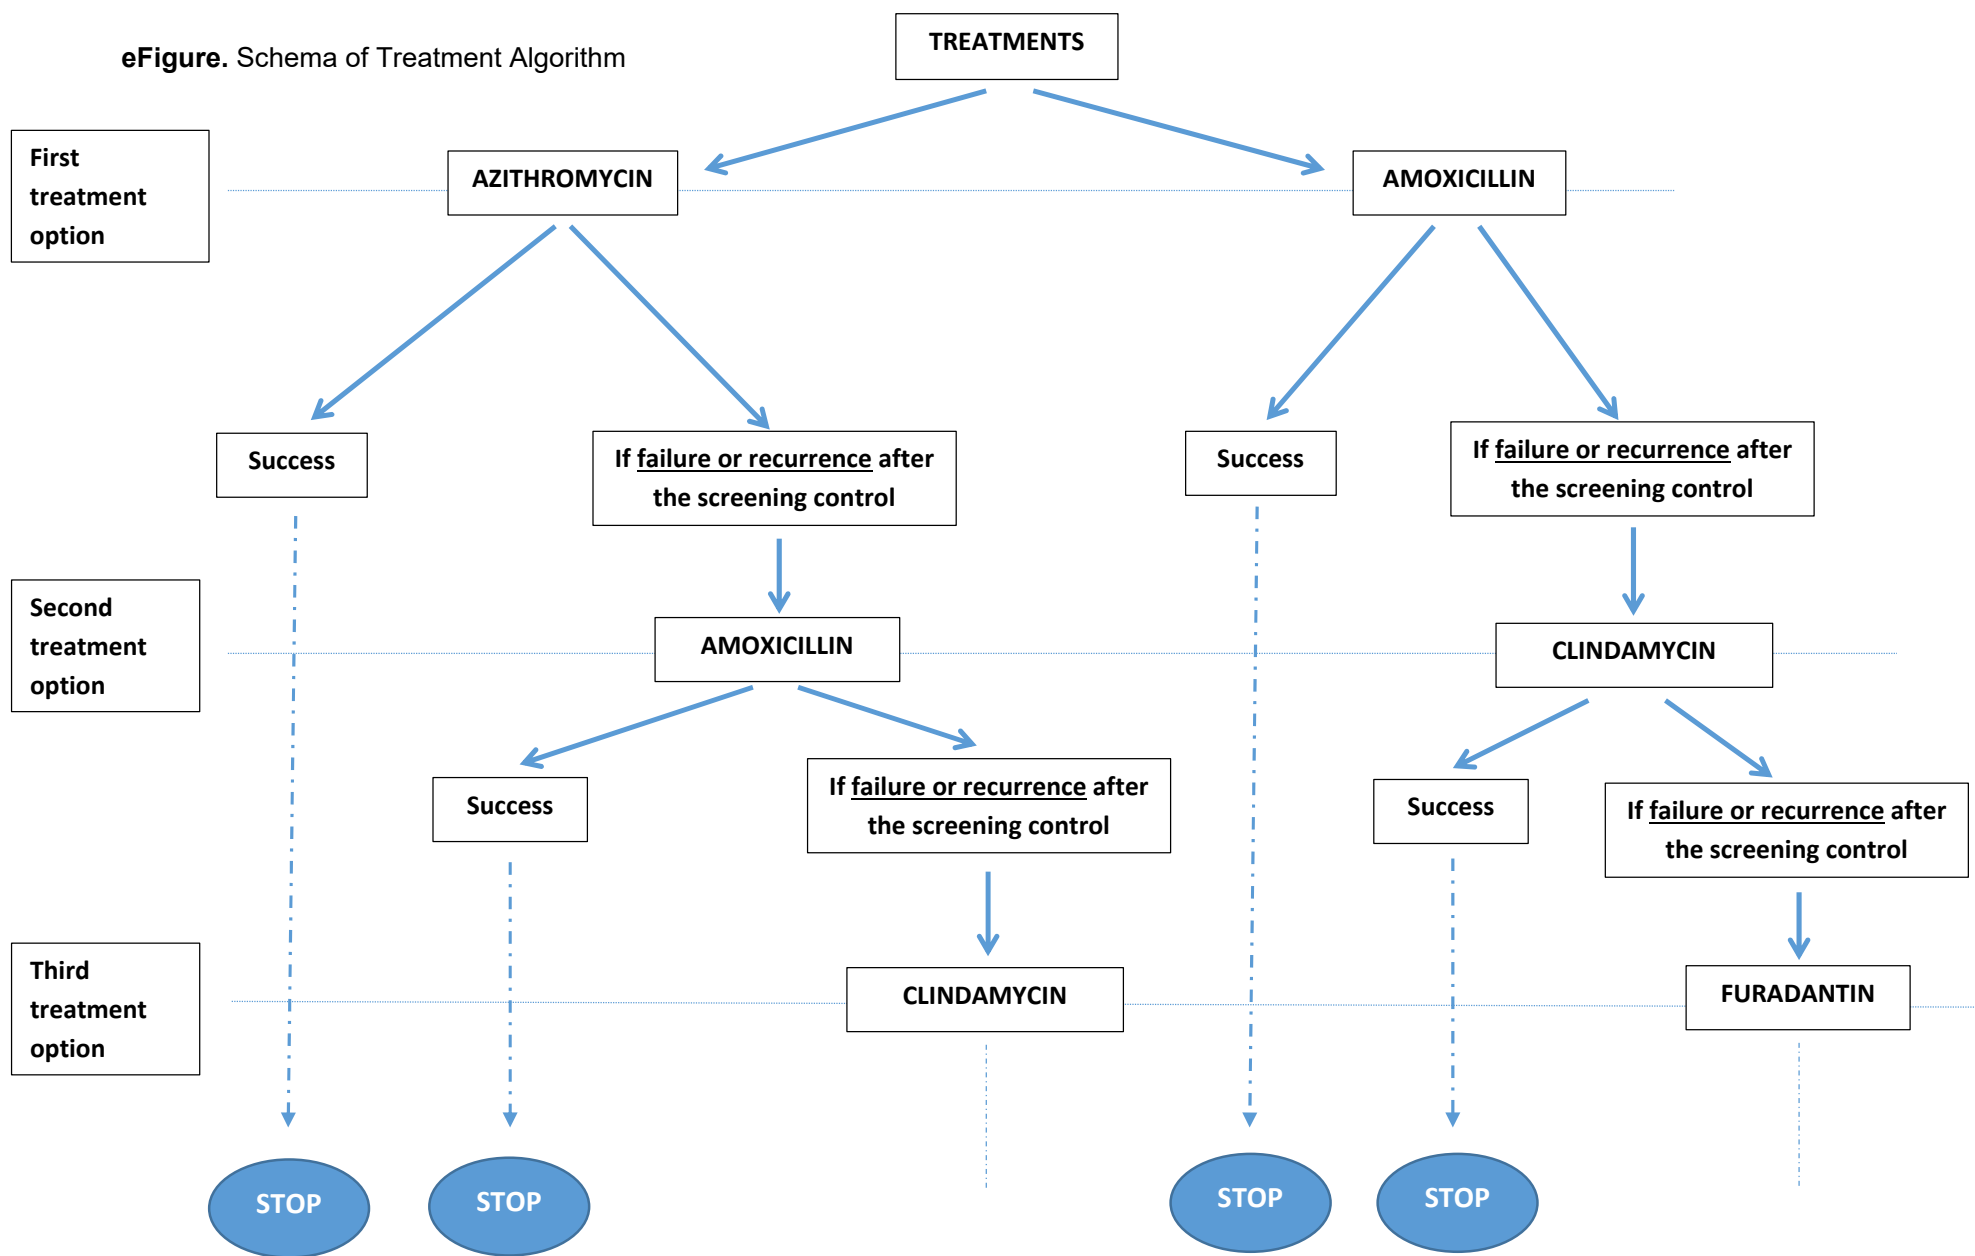

**eTable 1.** Table of Primers and Probes Used in the Study

| PCR target                   | DNA target    | Primers names | Sequences (5'→3')       | Probes                         |
|------------------------------|---------------|---------------|-------------------------|--------------------------------|
| <i>Gardnerella vaginalis</i> | <i>Cpn 60</i> | Gvaginalis_F  | CGCATCTGCTAAGGATGTTG    | VIC-TGCAACTATTTCTGCAGCAGATCCT  |
|                              |               | Gvaginalis_R  | CAGCAATCTTTTCGCCAACT    |                                |
| <i>Atopobium vaginae</i>     | 16S rRNA      | Atop_F        | CCCTATCCGCTCCTGATACC    | VIC-GCAGGCTTGAGTCTGGTAGGGGA    |
|                              |               | Atop_R        | CCAAATATCTGCGCATTTC     |                                |
| Human albumin                | Exon 12       | Alb_F         | GCTGTCATCTTGTGGGCTGT    | FAM-CCTGTCATGCCCACACAAATCTCTCC |
|                              |               | Alb_R         | AAACTCATGGGAGCTGCTGGTTC |                                |

PCR: polymerase chain reaction.

## **eMethods 1. Molecular Analysis Procedure**

The vaginal specimens were discharged into 500  $\mu$ l of BME (Basal Medium Eagle, Gibco) and 200  $\mu$ l of suspension for DNA extraction using a QIAamp Tissue Kit (Qiagen, Courtaboeuf, France) on the BioRobot EZ1 automated system (Qiagen). Next, five  $\mu$ L of either a pure, undiluted DNA sample or a DNA sample diluted to 1/10 $\mu$ L was added to ready-to-use PCR mixes (see protocol study). Human albumin gene quantification was performed as an internal control to provide evidence for the presence of DNA and its quality. Master mixtures were systematically introduced as negative controls. qPCR was performed using a CFX96 Real-Time system (Bio-Rad Laboratories, Foster City, CA, USA).

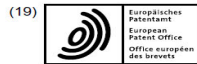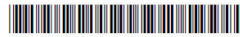

(11) EP 2 087 134 B1

(12) FASCICULE DE BREVET EUROPEEN

(45) Date de publication et mention de la délivrance du brevet: 10.08.2011 Bulletin 2011/32

(51) Int Cl.: C12Q 1/68 (2006.01)

(21) Numéro de dépôt: 07866534.6

(86) Numéro de dépôt international: PCT/FR2007/052368

(22) Date de dépôt: 20.11.2007

(87) Numéro de publication internationale: WO 2008/062136 (29.05.2008 Gazette 2008/22)

(54) METHODE DE DIAGNOSTIC ET DE SUIVI D'UNE VAGINOSE BACTERIENNE PAR QUANTIFICATION MOLECULAIRE  
 VERFAHREN ZUR DIAGNOSE UND VERFOLGUNG VON BAKTERIELLER VAGINOSE MITTELS MOLEKULARER QUANTIFIZIERUNG  
 METHOD FOR DIAGNOSIS OF AND FOLLOWING A BACTERIAL VAGINOSIS BY MOLECULAR QUANTIFICATION

(84) Etats contractants désignés: AT BE BG CH CY CZ DE DK EE ES FI FR GB GR HU IE IS IT LI LT LU LV MC MT NL PL PT RO SE SI SK TR

- BRADSHAW C S ET AL: "The association of Atopobium vaginae and Gardnerella vaginalis with bacterial vaginosis and recurrence after oral metronidazole therapy" JOURNAL OF INFECTIOUS DISEASES, CHICAGO, IL, US, vol. 194, no. 6, 15 septembre 2006 (2006-09-15), pages 828-836, XP009086643 ISSN: 0022-1899

(30) Priorité: 24.11.2006 FR 0610313

- TABRIZI SEPEHR N ET AL: "Prevalence of Gardnerella vaginalis and Atopobium vaginae in virginal women" SEXUALLY TRANSMITTED DISEASES, LIPPINCOTT CO., PHILADELPHIA, US, vol. 33, no. 11, 1 novembre 2006 (2006-11-01), pages 663-665, XP009086642 ISSN: 0148-5717

(43) Date de publication de la demande: 12.08.2009 Bulletin 2009/33

(73) Titulaire: Université de la Méditerranée (Aix-Marseille II)  
 13284 Marseille Cédex 07 (FR)

- ZARIFFARD M REZA ET AL: "Detection of bacterial vaginosis-related organisms by real-time PCR for Lactobacilli, Gardnerella vaginalis and Mycoplasma hominis." 13 décembre 2002 (2002-12-13), FEMS IMMUNOLOGY AND MEDICAL MICROBIOLOGY 13 DEC 2002, VOL. 34, NR. 4, PAGE(S) 277 - 281, XP002442546 ISSN: 0928-8244 page 278, colonne 1, alinéa 2 page 278, colonne 2, alinéas 2,3 tableau 1 le document en entier

(72) Inventeurs:

- BRETELLE, Florence  
 13014 Marseille (FR)
- FENOLLAR, Florence  
 13008 Marseille (FR)
- HENRY-MARY, Mireille  
 13850 Greasque (FR)
- MENARD, Jean-Pierre  
 13008 Marseille (FR)
- RAOULT, Didier  
 13008 Marseille (FR)

- VERHELST RITA ET AL: "Comparison between Gram stain and culture for the characterization of vaginal microflora: Definition of a distinct grade that resembles grade I microflora and revised categorization of grade I microflora" BMC MICROBIOLOGY, BIOMED CENTRAL, LONDON, GB, vol. 5, no. 1, 14 octobre 2005 (2005-10-14), page 61, XP021002663 ISSN: 1471-2180

(74) Mandataire: Domange, Maxime et al  
 Cabinet Beau de Lomenie  
 232, avenue du Prado  
 13295 Marseille Cedex 08 (FR)

(56) Documents cités:  
 US-A1-2005 095 603

Il est rappelé que: Dans un délai de neuf mois à compter de la publication de la mention de la délivrance du brevet européen au Bulletin européen des brevets, toute personne peut faire opposition à ce brevet auprès de l'Office européen des brevets, conformément au règlement d'exécution. L'opposition n'est réputée formée qu'après le paiement de la taxe d'opposition. (Art. 99(1) Convention sur le brevet européen).

EP 2 087 134 B1

**eTable 2.** Details of Cost Outcomes According to Randomly Assigned Groups in the AuTop Study

|                                             | S&T<br>(N=3,333)<br>Mean [95%CI]   | Control<br>(N=3,338)<br>Mean [95%CI] | p-value |
|---------------------------------------------|------------------------------------|--------------------------------------|---------|
| <b>Intervention costs</b>                   |                                    |                                      |         |
| Swabs, tests and treatment                  | <b>203.5 [196.5 – 209.5]</b>       | --                                   |         |
| <b>Medical care costs</b>                   |                                    |                                      |         |
| <b>Mother</b>                               | <b>2,750.4 [2,718.7 – 2,782.1]</b> | <b>2,762.9 [2,730.7 – 2,795.1]</b>   | .587    |
| Outpatient care during pregnancy            | 64.6 [61.5 – 67.7]                 | 66.2 [63.2 – 69.3]                   | .241    |
| Inpatient care during pregnancy             | 179.0 [156.3 – 201.7]              | 176.5 [154.1 – 198.9]                | .515    |
| Inpatient care at delivery/end of pregnancy | 2,523.1 [2,506.5 – 2,539.6]        | 2,546.1 [2,528.7 – 2,563.3]          | .088    |
| <b>Neonate<sup>£</sup></b>                  | <b>374.1 [296.8 – 451.4]</b>       | <b>484.1 [371.8 – 596.5]</b>         | .628    |
| <b>Total Costs</b>                          |                                    |                                      |         |
| Primary analysis population                 | 3344.3 [3257.0 – 3431.0]           | 3272.9 [3149.5 – 3396.3]             | .232    |
| In nulliparous                              | 3626.2 [3528.4 – 3723.9]           | 3727.7 [3519.5 – 3935.9]             | .352    |
| In multiparous                              | 3061.0 [2918.2 – 3203.8]           | 2761.3 [2648.6 – 2874.0]             | 0.012   |

Mean [95%CI]: mean [95% Confidence Interval]· NICU: Neonatal Intensive Care Unit·

Pathological leaves were evaluated but for 62% of the population, the variable was not filled in and in the same proportion between the two groups, they were not valued·

£: Costs for neonates included NICU care, all transfers and home inpatient care·

**eTable 3.** Sensitivity Analyses With Complete Cases and With Missing Values Imputed Using the Worst-Case Scenario

| Type of analysis                                                      | Variables/covariates        | modality | N     | aOR<br>(95%CI)    | P-value |
|-----------------------------------------------------------------------|-----------------------------|----------|-------|-------------------|---------|
| <b>Analysis on complete cases (N=6,090) §</b>                         |                             |          |       |                   |         |
|                                                                       | Groups                      | S&T      | 3,041 | 0.61 (0.44, 0.83) | .002    |
|                                                                       | Tobacco                     | No       | 5,418 | 0.71 (0.51, 0.99) | .044    |
|                                                                       | Nulliparous                 | No       | 2,999 | 0.52 (0.37, 0.74) | <.001   |
|                                                                       | Caucasian                   | No       | 279   | 0.77 (0.47, 1.28) | .320    |
|                                                                       | Assisted pregnancy+         | No       | 5,717 | 1.00 (0.81, 1.64) | .999    |
|                                                                       | Miscarriage                 | No       | 4,729 | 0.81 (0.62, 1.06) | .130    |
|                                                                       | BMI                         |          | 6,090 | 1.00 (0.99, 1.00) | .540    |
|                                                                       | Age                         |          | 6,090 | 1.01 (0.98, 1.03) | .900    |
|                                                                       | Groups S&T X Nulliparous No |          |       | 2.08 (1.28, 3.37) | .003    |
| <b>Analysis on imputed data using worse-case scenario (N=6,671) †</b> |                             |          |       |                   |         |
|                                                                       | Groups                      | S&T      | 3,333 | 0.87 (0.70, 1.07) | .170    |
|                                                                       | Tobacco                     | No       | 5,935 | 0.97 (0.75, 1.25) | .800    |
|                                                                       | Nulliparous                 | No       | 3,430 | 0.63 (0.49, 0.80) | <.001   |
|                                                                       | Caucasian                   | No       | 6,287 | 0.85 (0.61, 1.18) | .340    |
|                                                                       | Assisted pregnancy+         | No       | 6,243 | 1.14 (0.80, 1.62) | .460    |

|             |    |       |                   |      |
|-------------|----|-------|-------------------|------|
| Miscarriage | No | 5,180 | 0.83 (0.68, 1.01) | .055 |
| -----       |    |       |                   |      |
| BMI         |    | 6,671 | 1.00 (0.98, 1.01) | .910 |
| -----       |    |       |                   |      |
| Age         |    | 6,671 | 0.99 (0.98, 1.01) | .910 |
| -----       |    |       |                   |      |

aOR: adjusted Odds Ratio; 95%CI: 95% Confidence Interval.

+: Assisted reproductive technology pregnancy

§: In the Complete cases analysis, the data set included all randomized individuals at baseline who completed the follow-up; for the primary medical outcome, N=6,371; considering missing data in covariates, N=6,090.

£: In the worst-case scenario, missing values were imputed by assigning the worst possible value of the outcome (i.e. failures, and putting the mean term for preterm birth) to dropouts in both groups; the interaction Groups X Nulliparous is not more significant.



**eTable 4.** Characteristics of the Patients in the Subgroup of Nulliparous and Multiparous Women According to Randomly Assigned Group

| Characteristics                                            | Nulliparous                 |                      | Multiparous                 |                      |
|------------------------------------------------------------|-----------------------------|----------------------|-----------------------------|----------------------|
|                                                            | Screen & Treat<br>(N=1,671) | Control<br>(N=1,767) | Screen & Treat<br>(N=1,662) | Control<br>(N=1,571) |
| Age (y)                                                    | 29.1+/-4.9                  | 29.3+/-5.0           | 31.9 (4.7)                  | 32.2 (4.8)           |
| Ethnic group – no. (%) <sup>§</sup>                        |                             |                      |                             |                      |
| European                                                   | 1,075 (64.7)                | 1,148 (65.6)         | 893 (54.0)                  | 832 (53.4)           |
| Caucasian*                                                 | 70 (4.2)                    | 68 (3.9)             | 77 (4.7)                    | 76 (4.9)             |
| North African                                              | 327 (19.7)                  | 319 (18.2)           | 435 (26.3)                  | 406 (26.0)           |
| Sub-Saharan African                                        | 113 (6.8)                   | 129 (7.4)            | 193 (11.7)                  | 188 (12.1)           |
| Asian                                                      | 32 (1.9)                    | 28 (1.6)             | 25 (1.5)                    | 27 (1.7)             |
| Other                                                      | 45 (2.7)                    | 59 (3.4)             | 32 (1.9)                    | 30 (1.9)             |
| Level > Bachelor's degree (yes) – no. (%) <sup>§</sup>     | 1,439 (86.6)                | 1,527 (86.8)         | 1,277 (77.5)                | 1,231 (79.2)         |
| Active (yes) – no. (%) <sup>§</sup>                        | 1,260 (75.9)                | 1,328 (75.5)         | 1,052 (63.6)                | 1,000 (64.1)         |
| Previous early miscarriage (yes) – no. (%) <sup>μ</sup>    | 269 (16.2)                  | 289 (16.5)           | 468 (28.2)                  | 453 (28.9)           |
| Previous abortion (yes) – no. (%)                          | 313 (18.8)                  | 319 (18.2)           | 320 (19.3)                  | 326 (20.8)           |
| Gestational age at inclusion (weeks)                       | 15.6+/-2.8                  | 15.7+/-2.8           | 15.5+/-2.8                  | 15.4+/-2.8           |
| Assisted reproductive technology pregnancy (yes) – no. (%) | 121 (7.2)                   | 154 (8.7)            | 68 (4.1)                    | 49 (3.2)             |
| Body mass index (kg/m <sup>2</sup> )                       | 23.4+/-4.5                  | 23.7+/-4.6           | 24.7+/-5.2                  | 24.7+/-4.9           |

|                                                                          |            |            |            |            |
|--------------------------------------------------------------------------|------------|------------|------------|------------|
| Tobacco use (yes) – no. (%) <sup>§</sup>                                 | 183 (11.0) | 215 (12.2) | 181 (10.9) | 146 (9.3)  |
| Smoking during pregnancy (>10<br>cig/day) – no. (%) <sup>§</sup>         | 7 (0.4)    | 11 (0.6)   | 13 (0.8)   | 13 (0.8)   |
| Alcohol use (yes) – no. (%) <sup>§</sup>                                 | 16 (1.0)   | 19 (1.1)   | 13 (0.8)   | 14 (0.9)   |
| Vaginal toilet practice during pregnancy<br>(yes) – no. (%) <sup>§</sup> | 150 (9.1)  | 130 (7.5)  | 159 (9.7)  | 175 (11.4) |

means +/- SD: mean +/- standard deviation. \*: Native to the Caucasus region. §: These variables were self-reported. μ: Previous abortion includes therapeutic and spontaneous abortions
