# Supplementary material for: Effectiveness and Costs of Molecular Screening and Treatment for Bacterial Vaginosis to Prevent Preterm Birth: The AuTop Randomized Clinical Trial
Source: PubMed Central journal article supplement (PMC10352927; doi:10.1001/jamapediatrics.2023.2250), 2023-07-17
Supplement: jamapediatr-e232250-s004.pdf [file jamapediatr-e232250-s004.pdf]

\*Indicates required information. Only first name, last name, and suffix will appear in PubMed.

| <b>*Group Name(s): Groupe de Recherche en Obstetrique et Gynecologie (GROG) Investigators</b> |                   |                              |                  |             |                                          |                                                         |                                                                                            |
|-----------------------------------------------------------------------------------------------|-------------------|------------------------------|------------------|-------------|------------------------------------------|---------------------------------------------------------|--------------------------------------------------------------------------------------------|
| <b>*First Name and Middle Initial(s)</b>                                                      | <b>*Last Name</b> | <b>*Suffix (eg, Jr, III)</b> | Academic Degrees | Institution | Location (city, state/province, country) | Role or Contribution, eg, chair, principal investigator | Group (if more than 1 Group listed in the byline) and/or Subgroup (eg, Steering Committee) |
| Anne                                                                                          | Ego               |                              | MD PhD           | CHU         | Grenoble, France                         | Brainstorming group before conception                   | GROG                                                                                       |
| Catherine                                                                                     | Deneux-tharoux    |                              | MD PhD           | Inserm      | Paris, France                            | Brainstorming group before conception                   | GROG                                                                                       |
| Bruno                                                                                         | Carbonne          |                              | MD PhD           | CHU         | Monaco                                   | Brainstorming group before conception                   | GROG                                                                                       |
| Camille                                                                                       | Leray             |                              | MD PhD           | CHU         | Paris, France                            | Brainstorming group before conception                   | GROG                                                                                       |
| Damien                                                                                        | Subtil            |                              | MD PhD           | CHU         | Lille, France                            | Brainstorming group before conception                   | GROG                                                                                       |
| Claude                                                                                        | D'Ercole          |                              | MD PhD           | CHU         | Marseille, France                        | Brainstorming group before conception                   | GROG                                                                                       |
| Denis                                                                                         | Gallot            |                              | MD PhD           | CHU         | Clermont Ferrand, France                 | Brainstorming group before conception                   | GROG                                                                                       |
| Christophe                                                                                    | Vayssiere         |                              | MD PhD           | CHU         | Toulouse, France                         | Brainstorming group before conception                   | GROG                                                                                       |
| Franck                                                                                        | Perrotin          |                              | MD PhD           | CHU         | Tours, France                            | Brainstorming group before conception                   | GROG                                                                                       |
| Francois                                                                                      | Goffinet          |                              | MD PhD           | CHU         | Paris, France                            | Brainstorming group before conception                   | GROG                                                                                       |
| Paul                                                                                          | Berveiller        |                              | MD PhD           | CHU         | Paris, France                            | Brainstorming group before conception                   | GROG                                                                                       |
| Loic                                                                                          | Sentilhes         |                              | MD PhD           | CHU         | Bordeaux, France                         | Brainstorming group before conception                   | GROG                                                                                       |
| Veronique                                                                                     | Debarge           |                              | MD PhD           | CHU         | Lille, France                            | Brainstorming group before conception                   | GROG                                                                                       |
| Laurent                                                                                       | Salomon           |                              | MD PhD           | CHU         | Paris, France                            | Brainstorming group before conception                   | GROG                                                                                       |
| Charles                                                                                       | Garabedian        |                              | MD PhD           | CHU         | Lille, France                            | Brainstorming group before conception                   | GROG                                                                                       |

Supplemental Online Content: Nonauthor Collaborators

\*Indicates required information. Only first name, last name, and suffix will appear in PubMed.

| <b>*First Name and Middle Initial(s)</b> | <b>*Last Name</b> | <b>*Suffix (eg, Jr, III)</b> | Academic Degrees | Institution | Location (city, state/province, country) | Role or Contribution, eg, chair, principal investigator | Group (if more than 1 Group listed in the byline) and/or Subgroup (eg, Steering Committee) |
|------------------------------------------|-------------------|------------------------------|------------------|-------------|------------------------------------------|---------------------------------------------------------|--------------------------------------------------------------------------------------------|
| Jean Baptiste                            | Haumonté          |                              | MD PhD           | CHU         | Marseille, France                        | Brainstorming group before conception                   | GROG                                                                                       |
| Thibaud                                  | Quibel            |                              | MD PhD           | CHU         | Paris, France                            | Brainstorming group before conception                   | GROG                                                                                       |
| Florent                                  | Fuchs             |                              |                  | CHU         | Montpellier, France                      | Brainstorming group before conception                   | GROG                                                                                       |
| Karine                                   | Baumstarck        |                              | MD PhD           | AMU         | Marseille, France                        | Brainstorming group before conception                   | steering Committee                                                                         |
| Pascal                                   | Auquier           |                              | MD PhD           | AMU         | Marseille, France                        | Brainstorming group before conception                   | steering Committee                                                                         |
| Cécile                                   | Fortanier         |                              | PhD              | APHM CHU    | Marseille, France                        | Brainstorming group before conception                   | steering Committee                                                                         |
