# Supplementary material for: Effectiveness and Costs of Molecular Screening and Treatment for Bacterial Vaginosis to Prevent Preterm Birth: The AuTop Randomized Clinical Trial
Source: PubMed Central journal article supplement (PMC10352927; doi:10.1001/jamapediatrics.2023.2250), 2023-07-17
Supplement: jamapediatr-e232250-s005.pdf [file jamapediatr-e232250-s005.pdf]

## Data Sharing Statement

Bretelle. Effectiveness and Costs of Molecular Screening and Treatment for Bacterial Vaginosis to Prevent Preterm Birth. *JAMA Pediatr.* Published July 17, 2023.

doi:10.1001/jamapediatrics.2023.2250

### Data

**Data available:** Yes

**Data types:** Deidentified participant data

**How to access data:** on request at aap.drs@ap-hm.fr or sandrine.loubiere@univ-amu.fr

**When available:** With publication

### Supporting Documents

**Document types:** None

### Additional Information

**Who can access the data:** aap.drs@ap-hm.fr or sandrine.loubiere@univ-amu.fr

**Types of analyses:** the data will be available for any purpose after checking for the scientific interest of the purpose by the research teams and authors of the study

**Mechanisms of data availability:** the data will be available after approval of a proposal by authors and with a signed data access agreement
